# Supplementary material for: Pleiotropic Impact of Endosymbiont Load and Co-Occurrence in the Maize Weevil Sitophilus zeamais
Source: PubMed Central journal article supplement (PMC4210188; doi:10.1371/journal.pone.0111396), 2014-10-27
Supplement: pone.0111396.s003.pdf [file pone.0111396.s003.pdf]

| <b>Sample</b> | <b>C<sub>T</sub></b> | <b>C<sub>T</sub></b> | <b>C<sub>T</sub></b> | <b>C<sub>T</sub> Mean</b> | <b>C<sub>T</sub> SD</b> | <b>y</b> | <b>OPC</b> | <b>copies/μL</b> |
|---------------|----------------------|----------------------|----------------------|---------------------------|-------------------------|----------|------------|------------------|
| Control       | 18.68                | 18.76                | 19.07                | 18.84                     | 0.21                    | 3.28     | 1911.38    | 159.28           |
| Control       | 18.02                | 18.06                | 17.35                | 17.81                     | 0.40                    | 3.71     | 5132.36    | 427.70           |
| Control       | 16.71                | 17.41                | 17.67                | 17.26                     | 0.49                    | 3.87     | 7452.74    | 621.06           |
| Control       | 21.05                | 20.76                | 20.23                | 20.68                     | 0.42                    | 3.28     | 1902.92    | 158.58           |
| Control       | 21.68                | 21.94                | 21.54                | 21.72                     | 0.20                    | 3.97     | 9308.28    | 775.69           |
| Control       | 21.55                | 22.29                | 21.71                | 21.85                     | 0.39                    | 3.87     | 7461.30    | 621.77           |
| Amoxicillin   | 26.92                | 26.47                | 27.09                | 26.82                     | 0.32                    | 3.03     | 1059.86    | 88.32            |
| Amoxicillin   | 24.64                | 25.69                | 24.67                | 25.00                     | 0.60                    | 3.51     | 3220.53    | 268.38           |
| Amoxicillin   | 25.19                | 25.85                | 25.70                | 25.58                     | 0.34                    | 3.35     | 2257.23    | 188.10           |
| Amoxicillin   | 28.81                | 28.39                | 28.07                | 28.42                     | 0.37                    | 2.60     | 400.16     | 33.35            |
| Amoxicillin   | 32.03                | 32.29                | 32.89                | 32.40                     | 0.44                    | 1.55     | 35.54      | 2.96             |
| Amoxicillin   | 28.18                | 27.36                | 28.97                | 28.17                     | 0.80                    | 2.67     | 467.15     | 38.93            |
| Ciprofloxacin | 28.85                | 29.45                | 28.79                | 29.03                     | 0.37                    | 2.44     | 276.68     | 23.06            |
| Ciprofloxacin | 28.11                | 26.64                | 26.47                | 27.08                     | 0.90                    | 2.96     | 909.62     | 75.80            |
| Ciprofloxacin | 24.02                | 24.54                | 23.41                | 23.99                     | 0.57                    | 3.77     | 5944.93    | 495.41           |
| Ciprofloxacin | 29.86                | 29.27                | 31.13                | 30.09                     | 0.95                    | 2.16     | 145.65     | 12.14            |
| Ciprofloxacin | 27.05                | 26.01                | 25.65                | 26.24                     | 0.73                    | 3.18     | 1516.50    | 126.38           |
| Ciprofloxacin | 23.04                | 23.41                | 23.14                | 23.20                     | 0.19                    | 3.72     | 5243.53    | 436.96           |
| Rifamycin     | 29.18                | 28.29                | 29.32                | 28.93                     | 0.56                    | 2.47     | 294.14     | 24.51            |
| Rifamycin     | 29.35                | 31.69                | 31.37                | 30.81                     | 1.27                    | 1.97     | 93.96      | 7.83             |
| Rifamycin     | 32.16                | 32.85                | 31.55                | 32.18                     | 0.65                    | 1.61     | 40.61      | 3.38             |
| Rifamycin     | 29.01                | 29.26                | 29.32                | 29.20                     | 0.16                    | 2.40     | 250.26     | 20.86            |
| Rifamycin     | 28.74                | 28.14                | 28.60                | 28.49                     | 0.32                    | 2.58     | 383.91     | 31.99            |
| Rifamycin     | 33.44                | 34.02                | 33.96                | 33.81                     | 0.32                    | 1.18     | 15.12      | 1.26             |
| Tetracycline  | 32.24                | 33.09                | 33.62                | 32.98                     | 0.70                    | 1.40     | 25.00      | 2.08             |
| Tetracycline  | 33.24                | 34.22                | 34.03                | 33.83                     | 0.52                    | 1.17     | 14.93      | 1.24             |
| Tetracycline  | 31.53                | 30.37                | 30.67                | 30.86                     | 0.61                    | 1.96     | 91.11      | 7.59             |
| Tetracycline  | 28.03                | 27.68                | 28.11                | 27.94                     | 0.23                    | 2.73     | 537.47     | 44.79            |
| Tetracycline  | 33.51                | 33.81                | 33.04                | 33.45                     | 0.39                    | 1.27     | 18.78      | 1.57             |
| Tetracycline  | 33.98                | 33.09                | 33.71                | 33.60                     | 0.45                    | 1.24     | 17.21      | 1.43             |

|                   |       |       |       |       |      |      |       |      |
|-------------------|-------|-------|-------|-------|------|------|-------|------|
| Thermal treatment | 33.98 | 33.61 | 33.15 | 33.58 | 0.41 | 1.18 | 15.27 | 1.27 |
| Thermal treatment | 32.09 | 32.03 | 32.44 | 32.18 | 0.22 | 1.55 | 35.73 | 2.98 |
| Thermal treatment | 33.71 | 33.76 | 33.76 | 33.74 | 0.03 | 1.14 | 13.84 | 1.15 |
| Thermal treatment | 35.75 | 35.75 | 35.97 | 35.82 | 0.12 | 0.59 | 3.90  | 0.33 |
| Thermal treatment | 35.91 | 35.95 | 35.13 | 35.67 | 0.46 | 0.63 | 4.30  | 0.36 |
| Thermal treatment | 35.60 | 35.95 | 35.56 | 35.71 | 0.21 | 0.62 | 4.20  | 0.35 |

---
