# Supplementary material for: Pleiotropic Impact of Endosymbiont Load and Co-Occurrence in the Maize Weevil Sitophilus zeamais
Source: PubMed Central journal article supplement (PMC4210188; doi:10.1371/journal.pone.0111396), 2014-10-27
Supplement: pone.0111396.s004.pdf [file pone.0111396.s004.pdf]

| <b>Sample</b> | <b>C<sub>T</sub></b> | <b>C<sub>T</sub></b> | <b>C<sub>T</sub></b> | <b>C<sub>T</sub> Mean</b> | <b>C<sub>T</sub> SD</b> | <b>y</b> | <b>OPC</b> | <b>copies/μL</b> |
|---------------|----------------------|----------------------|----------------------|---------------------------|-------------------------|----------|------------|------------------|
| Control       | 26.46                | 26.07                | 26.30                | 26.28                     | 0.20                    | 3.11     | 1911.08    | 159.26           |
| Control       | 25.47                | 25.00                | 25.05                | 25.17                     | 0.26                    | 3.41     | 512.39     | 42.70            |
| Control       | 27.37                | 27.29                | 26.59                | 27.08                     | 0.43                    | 2.90     | 2412.83    | 201.07           |
| Control       | 27.67                | 27.21                | 27.64                | 27.51                     | 0.26                    | 2.79     | 1018.45    | 84.87            |
| Control       | 24.72                | 24.74                | 23.92                | 24.46                     | 0.47                    | 3.59     | 1823.53    | 151.96           |
| Control       | 27.05                | 27.34                | 27.04                | 27.14                     | 0.17                    | 2.88     | 917.10     | 76.43            |
| Amoxicillin   | 29.86                | 29.74                | 28.84                | 29.48                     | 0.56                    | 2.32     | 185.25     | 15.44            |
| Amoxicillin   | 30.12                | 30.22                | 30.03                | 30.12                     | 0.09                    | 2.15     | 125.35     | 10.45            |
| Amoxicillin   | 31.39                | 30.61                | 31.00                | 31.00                     | 0.39                    | 1.92     | 73.47      | 6.12             |
| Amoxicillin   | 33.50                | 33.95                | 33.70                | 33.72                     | 0.23                    | 1.20     | 14.07      | 1.17             |
| Amoxicillin   | 30.79                | 29.52                | 29.32                | 29.88                     | 0.80                    | 2.22     | 145.21     | 12.10            |
| Amoxicillin   | 28.96                | 29.11                | 28.92                | 29.00                     | 0.10                    | 2.45     | 248.78     | 20.73            |
| Ciprofloxacin | 25.02                | 25.24                | 25.22                | 25.16                     | 0.12                    | 3.46     | 2566.44    | 213.87           |
| Ciprofloxacin | 28.89                | 29.44                | 28.77                | 29.03                     | 0.36                    | 2.44     | 242.98     | 20.25            |
| Ciprofloxacin | 30.40                | 30.10                | 29.33                | 29.94                     | 0.55                    | 2.20     | 139.78     | 11.65            |
| Ciprofloxacin | 25.97                | 26.71                | 25.88                | 26.19                     | 0.46                    | 3.19     | 1373.09    | 114.42           |
| Ciprofloxacin | 26.26                | 25.37                | 26.76                | 26.13                     | 0.70                    | 3.21     | 1423.51    | 118.63           |
| Ciprofloxacin | 26.68                | 27.27                | 26.01                | 26.65                     | 0.63                    | 3.07     | 1035.75    | 86.31            |
| Rifamycin     | 28.36                | 28.08                | 28.89                | 28.44                     | 0.41                    | 2.60     | 348.15     | 29.01            |
| Rifamycin     | 28.43                | 27.17                | 28.42                | 28.01                     | 0.73                    | 2.71     | 453.84     | 37.82            |
| Rifamycin     | 31.37                | 31.03                | 30.98                | 31.13                     | 0.21                    | 1.89     | 67.98      | 5.67             |
| Rifamycin     | 26.87                | 26.39                | 26.45                | 26.57                     | 0.26                    | 3.09     | 1086.94    | 90.58            |
| Rifamycin     | 29.64                | 28.99                | 28.51                | 29.05                     | 0.56                    | 2.44     | 241.22     | 20.10            |
| Rifamycin     | 26.60                | 25.89                | 25.85                | 26.11                     | 0.42                    | 3.21     | 1438.91    | 119.91           |
| Tetracycline  | 31.21                | 31.77                | 30.41                | 31.13                     | 0.68                    | 1.89     | 67.84      | 5.65             |
| Tetracycline  | 27.37                | 27.29                | 26.59                | 27.08                     | 0.43                    | 2.96     | 796.64     | 66.39            |
| Tetracycline  | 38.48                | 37.06                | 38.26                | 37.94                     | 0.76                    | 0.09     | 1.08       | 0.09             |
| Tetracycline  | 38.42                | 38.35                | 39.27                | 38.68                     | 0.51                    | -0.11    | 0.69       | 0.06             |

|              |       |       |       |       |      |      |      |      |
|--------------|-------|-------|-------|-------|------|------|------|------|
| Tetracycline | 35.89 | 35.08 | 34.73 | 35.24 | 0.60 | 0.80 | 5.58 | 0.46 |
| Tetracycline | 35.98 | 34.61 | 35.29 | 35.29 | 0.69 | 0.79 | 5.39 | 0.45 |

---
