# Supplementary material for: Pleiotropic Impact of Endosymbiont Load and Co-Occurrence in the Maize Weevil Sitophilus zeamais
Source: PubMed Central journal article supplement (PMC4210188; doi:10.1371/journal.pone.0111396), 2014-10-27
Supplement: pone.0111396.s005.pdf [file pone.0111396.s005.pdf]

| <b>Sample</b> | <b>C<sub>T</sub></b> | <b>C<sub>T</sub></b> | <b>C<sub>T</sub></b> | <b>C<sub>T</sub> Mean</b> | <b>C<sub>T</sub> SD</b> | <b>y</b> | <b>OPC</b> | <b>copies/μL</b> |
|---------------|----------------------|----------------------|----------------------|---------------------------|-------------------------|----------|------------|------------------|
| Control       | 19.87                | 19.96                | 19.14                | 19.66                     | 0.45                    | 5.52     | 331118.89  | 27593.24         |
| Control       | 18.58                | 18.21                | 18.32                | 18.37                     | 0.19                    | 5.33     | 212273.99  | 17689.50         |
| Control       | 19.43                | 18.99                | 18.76                | 19.06                     | 0.34                    | 5.74     | 555118.56  | 46259.88         |
| Control       | 19.39                | 19.76                | 20.92                | 20.02                     | 0.80                    | 5.76     | 570759.61  | 47563.30         |
| Control       | 19.87                | 18.37                | 19.68                | 19.31                     | 0.82                    | 5.35     | 222253.34  | 18521.11         |
| Control       | 17.19                | 17.82                | 16.30                | 17.10                     | 0.77                    | 5.41     | 257617.92  | 21468.16         |
| Amoxicillin   | 18.94                | 18.68                | 18.41                | 18.67                     | 0.26                    | 5.23     | 169499.38  | 14124.95         |
| Amoxicillin   | 16.85                | 17.03                | 16.41                | 16.76                     | 0.32                    | 5.52     | 331118.89  | 27593.24         |
| Amoxicillin   | 18.38                | 18.93                | 19.77                | 19.02                     | 0.70                    | 5.76     | 569871.92  | 47489.33         |
| Amoxicillin   | 17.64                | 18.51                | 17.27                | 17.81                     | 0.63                    | 5.19     | 153570.43  | 12797.54         |
| Amoxicillin   | 16.66                | 17.79                | 17.79                | 17.41                     | 0.66                    | 5.15     | 142039.78  | 11836.65         |
| Amoxicillin   | 18.38                | 18.93                | 19.77                | 19.02                     | 0.70                    | 5.76     | 569871.92  | 47489.33         |
| Ciprofloxacin | 32.09                | 32.02                | 32.58                | 32.23                     | 0.30                    | 1.86     | 72.60      | 6.05             |
| Ciprofloxacin | 30.90                | 30.22                | 31.13                | 30.75                     | 0.47                    | 2.33     | 215.41     | 17.95            |
| Ciprofloxacin | 29.58                | 29.75                | 30.57                | 29.96                     | 0.53                    | 2.58     | 383.80     | 31.98            |
| Ciprofloxacin | 26.86                | 27.01                | 26.92                | 26.93                     | 0.07                    | 3.55     | 3567.37    | 297.28           |
| Ciprofloxacin | 35.87                | 35.87                | 35.11                | 35.62                     | 0.44                    | 0.78     | 6.02       | 0.50             |
| Ciprofloxacin | 35.13                | 35.06                | 34.80                | 35.00                     | 0.18                    | 0.98     | 9.51       | 0.79             |
| Rifamycin     | 18.21                | 17.73                | 17.47                | 17.80                     | 0.37                    | 5.19     | 154161.10  | 12846.76         |
| Rifamycin     | 17.44                | 16.19                | 17.23                | 16.95                     | 0.67                    | 5.24     | 172545.91  | 14378.83         |
| Rifamycin     | 23.51                | 22.04                | 22.78                | 22.78                     | 0.74                    | 4.88     | 75357.22   | 6279.77          |
| Rifamycin     | 15.09                | 15.73                | 14.94                | 15.25                     | 0.42                    | 5.63     | 422299.53  | 35191.63         |
| Rifamycin     | 16.53                | 16.50                | 16.89                | 16.64                     | 0.22                    | 5.66     | 461653.94  | 38471.16         |
| Rifamycin     | 22.94                | 22.38                | 22.24                | 22.52                     | 0.37                    | 4.96     | 90967.45   | 7580.62          |
| Tetracycline  | 18.75                | 18.79                | 18.99                | 18.84                     | 0.13                    | 5.49     | 312320.37  | 26026.70         |
| Tetracycline  | 17.07                | 17.35                | 17.67                | 17.36                     | 0.30                    | 5.39     | 246020.61  | 20501.72         |
| Tetracycline  | 17.04                | 17.53                | 17.04                | 17.20                     | 0.28                    | 5.70     | 499301.13  | 41608.43         |
| Tetracycline  | 17.23                | 17.54                | 17.71                | 17.49                     | 0.24                    | 5.29     | 193794.87  | 16149.57         |
| Tetracycline  | 17.73                | 17.69                | 18.03                | 17.82                     | 0.19                    | 5.18     | 152627.90  | 12718.99         |
| Tetracycline  | 16.10                | 16.03                | 15.84                | 15.99                     | 0.13                    | 5.61     | 403204.38  | 33600.37         |

|                   |       |       |       |       |      |      |        |       |
|-------------------|-------|-------|-------|-------|------|------|--------|-------|
| Thermal treatment | 34.86 | 35.63 | 35.24 | 35.24 | 0.39 | 1.09 | 1.98   | 0.91  |
| Thermal treatment | 35.37 | 35.37 | 35.30 | 35.33 | 0.02 | 1.11 | 1.17   | 0.92  |
| Thermal treatment | 31.74 | 29.97 | 30.86 | 30.86 | 1.39 | 2.30 | 199.16 | 16.60 |
| Thermal treatment | 37.28 | 37.39 | 37.34 | 37.34 | 1.97 | 0.23 | 1.71   | 0.14  |
| Thermal treatment | 34.58 | 34.90 | 34.74 | 34.74 | 1.00 | 1.06 | 11.49  | 0.96  |
| Thermal treatment | 33.13 | 32.95 | 33.04 | 33.04 | 0.94 | 1.60 | 40.08  | 3.34  |

---
