# Supplementary material for: Pleiotropic Impact of Endosymbiont Load and Co-Occurrence in the Maize Weevil Sitophilus zeamais
Source: PubMed Central journal article supplement (PMC4210188; doi:10.1371/journal.pone.0111396), 2014-10-27
Supplement: pone.0111396.s006.pdf [file pone.0111396.s006.pdf]

| <b>Sample</b> | <b>C<sub>T</sub></b> | <b>C<sub>T</sub></b> | <b>C<sub>T</sub></b> | <b>C<sub>T</sub> Mean</b> | <b>C<sub>T</sub> SD</b> | <b>y</b> | <b>OPC</b> | <b>copies/μL</b> |
|---------------|----------------------|----------------------|----------------------|---------------------------|-------------------------|----------|------------|------------------|
| Control       | 19.05                | 19.18                | 19.17                | 19.13                     | 0.07                    | 5.00     | 100428.54  | 8369.05          |
| Control       | 21.46                | 21.03                | 20.99                | 21.16                     | 0.26                    | 4.47     | 29300.27   | 2441.69          |
| Control       | 20.98                | 19.45                | 18.92                | 19.78                     | 1.07                    | 4.83     | 67597.11   | 5633.09          |
| Control       | 18.10                | 17.47                | 18.20                | 17.92                     | 0.40                    | 5.32     | 210045.60  | 17503.80         |
| Control       | 20.56                | 21.99                | 20.78                | 21.11                     | 0.77                    | 4.48     | 30210.95   | 2517.58          |
| Control       | 17.32                | 17.73                | 17.95                | 17.67                     | 0.32                    | 5.39     | 245459.91  | 20454.99         |
| Amoxicillin   | 20.22                | 20.30                | 20.00                | 20.17                     | 0.15                    | 4.73     | 53428.97   | 4452.41          |
| Amoxicillin   | 19.52                | 20.16                | 18.81                | 19.49                     | 0.67                    | 4.91     | 80655.38   | 6721.28          |
| Amoxicillin   | 22.73                | 20.40                | 20.72                | 21.28                     | 1.26                    | 4.43     | 27170.53   | 2264.21          |
| Amoxicillin   | 22.47                | 21.04                | 21.98                | 21.83                     | 0.73                    | 4.29     | 19465.96   | 1622.16          |
| Amoxicillin   | 18.15                | 18.79                | 18.85                | 18.60                     | 0.38                    | 5.14     | 139254.75  | 11604.56         |
| Amoxicillin   | 18.72                | 18.67                | 18.92                | 18.77                     | 0.13                    | 5.10     | 125210.69  | 10434.22         |
| Ciprofloxacin | 30.17                | 29.69                | 30.53                | 30.13                     | 0.42                    | 2.10     | 124.98     | 10.42            |
| Ciprofloxacin | 32.40                | 32.93                | 32.43                | 32.59                     | 0.30                    | 1.45     | 28.00      | 2.33             |
| Ciprofloxacin | 32.47                | 33.41                | 33.52                | 33.14                     | 0.58                    | 1.30     | 20.03      | 1.67             |
| Ciprofloxacin | 32.75                | 32.30                | 32.51                | 32.52                     | 0.23                    | 1.46     | 29.17      | 2.43             |
| Ciprofloxacin | 32.10                | 32.44                | 32.43                | 32.32                     | 0.19                    | 1.52     | 32.88      | 2.74             |
| Ciprofloxacin | 32.54                | 31.83                | 33.94                | 32.77                     | 1.07                    | 1.40     | 25.02      | 2.09             |
| Rifamycin     | 22.15                | 22.56                | 22.17                | 22.30                     | 0.23                    | 4.17     | 14656.70   | 1221.39          |
| Rifamycin     | 21.69                | 22.12                | 23.05                | 22.29                     | 0.69                    | 4.17     | 14760.41   | 1230.03          |
| Rifamycin     | 23.96                | 23.19                | 23.12                | 23.42                     | 0.46                    | 3.87     | 7393.97    | 616.16           |
| Rifamycin     | 21.67                | 21.55                | 21.54                | 21.59                     | 0.07                    | 4.35     | 22571.58   | 1880.96          |
| Rifamycin     | 21.67                | 21.66                | 22.02                | 21.78                     | 0.21                    | 4.30     | 20024.50   | 1668.71          |
| Rifamycin     | 26.77                | 28.70                | 27.97                | 27.81                     | 0.97                    | 2.71     | 511.33     | 42.61            |
| Tetracycline  | 18.04                | 18.51                | 20.03                | 18.86                     | 1.04                    | 5.07     | 118708.03  | 9892.34          |
| Tetracycline  | 20.71                | 22.99                | 20.61                | 21.44                     | 1.35                    | 4.39     | 24710.01   | 2059.17          |
| Tetracycline  | 20.60                | 20.98                | 20.50                | 20.69                     | 0.25                    | 4.59     | 38912.84   | 3242.74          |
| Tetracycline  | 19.44                | 18.58                | 18.46                | 18.83                     | 0.53                    | 5.08     | 120887.88  | 10073.99         |
| Tetracycline  | 18.43                | 18.56                | 18.37                | 18.45                     | 0.10                    | 5.18     | 151890.78  | 12657.57         |

|              |       |       |       |       |      |      |           |          |
|--------------|-------|-------|-------|-------|------|------|-----------|----------|
| Tetracycline | 18.13 | 18.30 | 18.44 | 18.29 | 0.16 | 5.23 | 168005.45 | 14000.45 |
|--------------|-------|-------|-------|-------|------|------|-----------|----------|

---
