# Supplementary material for: Pleiotropic Impact of Endosymbiont Load and Co-Occurrence in the Maize Weevil Sitophilus zeamais
Source: PubMed Central journal article supplement (PMC4210188; doi:10.1371/journal.pone.0111396), 2014-10-27
Supplement: pone.0111396.s007.pdf [file pone.0111396.s007.pdf]

| <b>Treatment</b>  | <b>Distance walked<br/>(cm)</b> | <b>Resting time<br/>(s)</b> | <b>Walking velocity<br/>(cm/s)</b> | <b>Free-fall flight<br/>(n°)</b> | <b>Death-feigning<br/>(s)</b> | <b>Body righting<br/>(s)</b> |
|-------------------|---------------------------------|-----------------------------|------------------------------------|----------------------------------|-------------------------------|------------------------------|
| Control           | 227.97                          | 242.25                      | 0.38                               | 41.20                            | 5.73                          | 3.09                         |
| Control           | 243.02                          | 239.07                      | 0.41                               | 44.70                            | 5.04                          | 3.70                         |
| Control           | 226.57                          | 249.00                      | 0.38                               | 42.07                            | 5.52                          | 4.24                         |
| Control           | 286.51                          | 178.12                      | 0.48                               | 33.67                            | 6.16                          | 2.50                         |
| Amoxicillin       | 209.13                          | 264.67                      | 0.35                               | 6.60                             | 6.04                          | 4.41                         |
| Amoxicillin       | 250.57                          | 207.59                      | 0.42                               | 7.50                             | 5.98                          | 4.34                         |
| Amoxicillin       | 228.41                          | 244.95                      | 0.38                               | 7.00                             | 7.30                          | 5.11                         |
| Amoxicillin       | 202.81                          | 270.47                      | 0.34                               | 6.90                             | 6.34                          | 3.79                         |
| Tetracycline      | 193.60                          | 284.40                      | 0.32                               | 5.90                             | 2.89                          | 3.66                         |
| Tetracycline      | 212.09                          | 255.84                      | 0.35                               | 7.00                             | 3.37                          | 3.37                         |
| Tetracycline      | 192.50                          | 276.82                      | 0.32                               | 8.27                             | 3.55                          | 3.56                         |
| Tetracycline      | 198.97                          | 260.87                      | 0.33                               | 7.50                             | 3.49                          | 3.05                         |
| Rifamycin         | 230.51                          | 256.83                      | 0.38                               | 8.50                             | 5.15                          | 3.08                         |
| Rifamycin         | 184.41                          | 291.33                      | 0.31                               | 8.30                             | 4.19                          | 2.98                         |
| Rifamycin         | 219.18                          | 264.12                      | 0.37                               | 9.07                             | 5.32                          | 4.49                         |
| Rifamycin         | 204.41                          | 262.25                      | 0.34                               | 12.27                            | 6.99                          | 3.75                         |
| Ciprofloxacin     | 198.71                          | 288.92                      | 0.33                               | 5.20                             | 20.07                         | 6.75                         |
| Ciprofloxacin     | 185.05                          | 280.07                      | 0.31                               | 5.40                             | 16.01                         | 8.58                         |
| Ciprofloxacin     | 195.56                          | 269.96                      | 0.33                               | 4.20                             | 15.30                         | 7.33                         |
| Ciprofloxacin     | 229.49                          | 221.30                      | 0.38                               | 6.60                             | 12.31                         | 7.59                         |
| Thermal treatment | 183.93                          | 285.66                      | 0.31                               | 5.00                             | 13.01                         | 7.03                         |
| Thermal treatment | 191.92                          | 268.15                      | 0.32                               | 6.30                             | 5.82                          | 5.56                         |
| Thermal treatment | 197.38                          | 269.97                      | 0.33                               | 5.80                             | 6.47                          | 6.04                         |
| Thermal treatment | 181.49                          | 297.25                      | 0.30                               | 5.90                             | 6.15                          | 7.98                         |

| <b>Take-off flight<br/>(n°)</b> | <b>Height reached<br/>(cm)</b> | <b>Overall group activity<br/>(<math>\Delta</math> pixels/s x 10<sup>-2</sup>)</b> | <b>Treatment</b>  |
|---------------------------------|--------------------------------|------------------------------------------------------------------------------------|-------------------|
| 4.00                            | 10.50                          | 47.80                                                                              | Control           |
| 3.00                            | 13.33                          | 52.91                                                                              | Control           |
| 3.00                            | 12.00                          | 40.00                                                                              | Control           |
| 3.00                            | 17.33                          | 42.70                                                                              | Control           |
| 0.00                            | 0.00                           | 30.91                                                                              | Amoxicillin       |
| 1.00                            | 2.00                           | 29.60                                                                              | Amoxicillin       |
| 1.00                            | 1.00                           | 29.21                                                                              | Amoxicillin       |
| 0.00                            | 0.00                           | 21.52                                                                              | Amoxicillin       |
| 0.00                            | 0.00                           | 25.15                                                                              | Tetracycline      |
| 0.00                            | 0.00                           | 14.44                                                                              | Tetracycline      |
| 1.00                            | 1.00                           | 18.73                                                                              | Tetracycline      |
| 0.00                            | 0.00                           | 31.61                                                                              | Tetracycline      |
| 1.00                            | 6.00                           | 25.21                                                                              | Rifamycin         |
| 2.00                            | 8.00                           | 23.10                                                                              | Rifamycin         |
| 0.00                            | 0.00                           | 28.43                                                                              | Rifamycin         |
| 2.00                            | 3.50                           | 24.73                                                                              | Rifamycin         |
| 0.00                            | 0.00                           | 18.51                                                                              | Ciprofloxacin     |
| 0.00                            | 0.00                           | 17.18                                                                              | Ciprofloxacin     |
| 0.00                            | 0.00                           | 18.55                                                                              | Ciprofloxacin     |
| 0.00                            | 0.00                           | 15.44                                                                              | Ciprofloxacin     |
| 0.00                            | 0.00                           | 16.06                                                                              | Thermal treatment |
| 0.00                            | 0.00                           | 9.86                                                                               | Thermal treatment |
| 0.00                            | 0.00                           | 10.30                                                                              | Thermal treatment |
| 0.00                            | 0.00                           | 9.92                                                                               | Thermal treatment |
