# Supplementary material for: Pleiotropic Impact of Endosymbiont Load and Co-Occurrence in the Maize Weevil Sitophilus zeamais
Source: PubMed Central journal article supplement (PMC4210188; doi:10.1371/journal.pone.0111396), 2014-10-27
Supplement: pone.0111396.s008.pdf [file pone.0111396.s008.pdf]

| <b>Treatment</b>  | <b>Insect body mass<br/>1<sup>st</sup> generation<br/>(mg)</b> | <b>Insect body mass<br/>2<sup>nd</sup> generation<br/>(mg)</b> | <b>Respiration rate<br/>1<sup>st</sup> generation<br/>(nmol CO<sub>2</sub>/insect/h)</b> | <b>Respiration rate<br/>2<sup>nd</sup> generation<br/>(nmol CO<sub>2</sub>/insect/h)</b> |
|-------------------|----------------------------------------------------------------|----------------------------------------------------------------|------------------------------------------------------------------------------------------|------------------------------------------------------------------------------------------|
| Control           | 3.23                                                           | 4.68                                                           | 93.32                                                                                    | 102.22                                                                                   |
| Control           | 3.22                                                           | 4.11                                                           | 93.31                                                                                    | 89.71                                                                                    |
| Control           | 3.42                                                           | 4.00                                                           | 103.87                                                                                   | 94.96                                                                                    |
| Control           | 3.52                                                           | 3.87                                                           | 101.14                                                                                   | 99.76                                                                                    |
| Amoxicillin       | 2.76                                                           | 2.81                                                           | 80.99                                                                                    | 83.52                                                                                    |
| Amoxicillin       | 2.68                                                           | 3.18                                                           | 72.63                                                                                    | 76.92                                                                                    |
| Amoxicillin       | 2.72                                                           | 3.20                                                           | 77.30                                                                                    | 76.04                                                                                    |
| Amoxicillin       | 2.93                                                           | 3.38                                                           | 82.56                                                                                    | 78.66                                                                                    |
| Tetracycline      | 2.80                                                           | 3.74                                                           | 109.38                                                                                   | 79.82                                                                                    |
| Tetracycline      | 2.87                                                           | 2.70                                                           | 85.18                                                                                    | 82.98                                                                                    |
| Tetracycline      | 2.73                                                           | 2.89                                                           | 82.71                                                                                    | 82.02                                                                                    |
| Tetracycline      | 2.98                                                           | 3.20                                                           | 84.63                                                                                    | 83.42                                                                                    |
| Rifamycin         | 3.00                                                           | 3.83                                                           | 93.75                                                                                    | 86.86                                                                                    |
| Rifamycin         | 2.54                                                           | 3.26                                                           | 77.25                                                                                    | 84.82                                                                                    |
| Rifamycin         | 3.16                                                           | 3.09                                                           | 78.57                                                                                    | 87.84                                                                                    |
| Rifamycin         | 2.96                                                           | 3.56                                                           | 83.59                                                                                    | 83.61                                                                                    |
| Ciprofloxacin     | 2.60                                                           | 2.46                                                           | 75.95                                                                                    | 73.65                                                                                    |
| Ciprofloxacin     | 2.40                                                           | 2.89                                                           | 77.35                                                                                    | 75.39                                                                                    |
| Ciprofloxacin     | 2.38                                                           | 2.45                                                           | 70.09                                                                                    | 56.43                                                                                    |
| Ciprofloxacin     | 2.50                                                           | 2.39                                                           | 71.99                                                                                    | 64.07                                                                                    |
| Thermal treatment | 3.03                                                           | —                                                              | 85.12                                                                                    | —                                                                                        |
| Thermal treatment | 3.23                                                           | —                                                              | 75.06                                                                                    | —                                                                                        |
| Thermal treatment | 2.79                                                           | —                                                              | 76.85                                                                                    | —                                                                                        |
| Thermal treatment | 3.04                                                           | —                                                              | 88.22                                                                                    | —                                                                                        |

| <b>Grain consumption<br/>1<sup>st</sup> generation<br/>(g)</b> | <b>Grain consumption<br/>2<sup>nd</sup> generation<br/>(g)</b> | <b>Fertility<br/>1<sup>st</sup> generation<br/>(total no. produced)</b> | <b>Fertility<br/>2<sup>nd</sup> generation<br/>(total no. produced)</b> | <b>Treatment</b>  |
|----------------------------------------------------------------|----------------------------------------------------------------|-------------------------------------------------------------------------|-------------------------------------------------------------------------|-------------------|
| 20.45                                                          | 55.58                                                          | 316.00                                                                  | 706.00                                                                  | Control           |
| 19.10                                                          | 51.42                                                          | 264.00                                                                  | 570.00                                                                  | Control           |
| 19.04                                                          | 27.60                                                          | 264.00                                                                  | 561.00                                                                  | Control           |
| 23.70                                                          | 28.88                                                          | 493.00                                                                  | 456.00                                                                  | Control           |
| 14.20                                                          | 64.23                                                          | 399.00                                                                  | 400.00                                                                  | Amoxicillin       |
| 14.70                                                          | 55.04                                                          | 259.00                                                                  | 439.00                                                                  | Amoxicillin       |
| 27.41                                                          | 49.30                                                          | 350.00                                                                  | 366.00                                                                  | Amoxicillin       |
| 19.38                                                          | 44.86                                                          | 269.00                                                                  | 511.00                                                                  | Amoxicillin       |
| 22.15                                                          | 49.03                                                          | 393.00                                                                  | 315.00                                                                  | Tetracycline      |
| 19.41                                                          | 24.95                                                          | 329.00                                                                  | 164.00                                                                  | Tetracycline      |
| 18.98                                                          | 20.56                                                          | 328.00                                                                  | 198.00                                                                  | Tetracycline      |
| 14.45                                                          | 28.04                                                          | 276.00                                                                  | 259.00                                                                  | Tetracycline      |
| 18.46                                                          | 69.40                                                          | 201.00                                                                  | 643.00                                                                  | Rifamycin         |
| 20.93                                                          | 45.84                                                          | 235.00                                                                  | 590.00                                                                  | Rifamycin         |
| 24.17                                                          | 48.02                                                          | 329.00                                                                  | 553.00                                                                  | Rifamycin         |
| 19.19                                                          | 55.89                                                          | 321.00                                                                  | 505.00                                                                  | Rifamycin         |
| 2.07                                                           | 35.05                                                          | 66.00                                                                   | 228.00                                                                  | Ciprofloxacin     |
| 5.75                                                           | 17.52                                                          | 184.00                                                                  | 171.00                                                                  | Ciprofloxacin     |
| 9.60                                                           | 17.60                                                          | 161.00                                                                  | 196.00                                                                  | Ciprofloxacin     |
| 8.67                                                           | 13.48                                                          | 98.00                                                                   | 100.00                                                                  | Ciprofloxacin     |
| —                                                              | —                                                              | —                                                                       | —                                                                       | Thermal treatment |
| —                                                              | —                                                              | —                                                                       | —                                                                       | Thermal treatment |
| —                                                              | —                                                              | —                                                                       | —                                                                       | Thermal treatment |
| —                                                              | —                                                              | —                                                                       | —                                                                       | Thermal treatment |
