# Supplementary material for: Pleiotropic Impact of Endosymbiont Load and Co-Occurrence in the Maize Weevil Sitophilus zeamais
Source: PubMed Central journal article supplement (PMC4210188; doi:10.1371/journal.pone.0111396), 2014-10-27
Supplement: pone.0111396.s009.pdf [file pone.0111396.s009.pdf]

1a Geração

Daily emergence

| replicate | days | control | Amoxyllin | Cirpofluxacin | Rifamycin | Tetracycline |
|-----------|------|---------|-----------|---------------|-----------|--------------|
| 1         | 1    | 0       | 0         | 0             | 0         | 0            |
| 1         | 3    | 0       | 1         | 0             | 0         | 3            |
| 1         | 6    | 0       | 5         | 0             | 2         | 8            |
| 1         | 9    | 0       | 7         | 0             | 1         | 17           |
| 1         | 12   | 7       | 11        | 2             | 4         | 19           |
| 1         | 15   | 15      | 14        | 3             | 10        | 23           |
| 1         | 18   | 25      | 32        | 2             | 11        | 29           |
| 1         | 21   | 16      | 40        | 2             | 21        | 27           |
| 1         | 24   | 21      | 41        | 7             | 3         | 43           |
| 1         | 27   | 31      | 35        | 7             | 12        | 56           |
| 1         | 30   | 35      | 38        | 9             | 21        | 44           |
| 1         | 33   | 44      | 39        | 4             | 12        | 29           |
| 1         | 36   | 46      | 59        | 8             | 12        | 39           |
| 1         | 39   | 31      | 31        | 7             | 10        | 38           |
| 1         | 42   | 14      | 19        | 10            | 29        | 11           |
| 1         | 45   | 10      | 10        | 1             | 15        | 6            |
| 1         | 48   | 11      | 9         | 1             | 15        | 1            |
| 1         | 51   | 5       | 4         | 3             | 16        | 0            |
| 1         | 55   | 5       | 2         | 0             | 5         | 0            |
| 1         | 57   | 0       | 2         | 0             | 2         | 0            |
| 1         | 60   | 0       | 0         | 0             | 0         | 0            |
| 1         | 63   | 0       | 0         | 0             | 0         | 0            |
| 1         | 66   | 0       | 0         | 0             | 0         | 0            |
| 1         | 69   | 0       | 0         | 0             | 0         | 0            |
| 2         | 1    | 0       | 0         | 0             | 0         | 0            |
| 2         | 3    | 0       | 0         | 0             | 0         | 1            |
| 2         | 6    | 0       | 0         | 1             | 0         | 0            |
| 2         | 9    | 0       | 0         | 4             | 4         | 4            |
| 2         | 12   | 6       | 0         | 6             | 10        | 14           |
| 2         | 15   | 14      | 14        | 5             | 16        | 17           |
| 2         | 18   | 15      | 30        | 6             | 11        | 15           |
| 2         | 21   | 9       | 22        | 11            | 15        | 42           |
| 2         | 24   | 26      | 32        | 13            | 5         | 55           |
| 2         | 27   | 16      | 17        | 21            | 13        | 39           |
| 2         | 30   | 30      | 41        | 30            | 33        | 30           |
| 2         | 33   | 29      | 47        | 27            | 15        | 25           |
| 2         | 36   | 31      | 21        | 20            | 31        | 36           |
| 2         | 39   | 28      | 8         | 16            | 19        | 30           |
| 2         | 42   | 21      | 7         | 6             | 21        | 7            |
| 2         | 45   | 14      | 9         | 12            | 27        | 7            |
| 2         | 48   | 10      | 5         | 3             | 8         | 4            |
| 2         | 51   | 10      | 2         | 0             | 5         | 1            |
| 2         | 55   | 3       | 1         | 2             | 1         | 1            |
| 2         | 57   | 2       | 1         | 1             | 0         | 1            |
| 2         | 60   | 0       | 1         | 0             | 1         | 0            |
| 2         | 63   | 0       | 0         | 0             | 0         | 0            |

|   |           |    |    |    |    |    |
|---|-----------|----|----|----|----|----|
| 2 | <b>66</b> | 0  | 1  | 0  | 0  | 0  |
| 2 | <b>69</b> | 0  | 0  | 0  | 0  | 0  |
| 3 | <b>1</b>  | 0  | 0  | 0  | 0  | 0  |
| 3 | <b>3</b>  | 0  | 0  | 0  | 0  | 1  |
| 3 | <b>6</b>  | 0  | 7  | 0  | 0  | 2  |
| 3 | <b>9</b>  | 0  | 13 | 1  | 3  | 7  |
| 3 | <b>12</b> | 2  | 15 | 4  | 0  | 17 |
| 3 | <b>15</b> | 14 | 28 | 4  | 2  | 23 |
| 3 | <b>18</b> | 13 | 38 | 8  | 2  | 36 |
| 3 | <b>21</b> | 23 | 29 | 14 | 13 | 42 |
| 3 | <b>24</b> | 33 | 40 | 16 | 11 | 37 |
| 3 | <b>27</b> | 32 | 40 | 17 | 27 | 42 |
| 3 | <b>30</b> | 28 | 27 | 29 | 38 | 22 |
| 3 | <b>33</b> | 29 | 23 | 27 | 31 | 22 |
| 3 | <b>36</b> | 30 | 33 | 13 | 54 | 20 |
| 3 | <b>39</b> | 19 | 21 | 5  | 41 | 24 |
| 3 | <b>42</b> | 14 | 9  | 7  | 30 | 11 |
| 3 | <b>45</b> | 12 | 14 | 8  | 22 | 10 |
| 3 | <b>48</b> | 6  | 7  | 1  | 20 | 3  |
| 3 | <b>51</b> | 3  | 1  | 5  | 21 | 1  |
| 3 | <b>55</b> | 3  | 4  | 2  | 5  | 1  |
| 3 | <b>57</b> | 3  | 1  | 0  | 4  | 3  |
| 3 | <b>60</b> | 0  | 0  | 0  | 1  | 3  |
| 3 | <b>63</b> | 0  | 0  | 0  | 4  | 1  |
| 3 | <b>66</b> | 0  | 0  | 0  | 0  | 0  |
| 3 | <b>69</b> | 0  | 0  | 0  | 0  | 0  |
| 4 | <b>1</b>  | 0  | 0  | 0  | 0  | 0  |
| 4 | <b>3</b>  | 0  | 0  | 0  | 2  | 0  |
| 4 | <b>6</b>  | 0  | 2  | 0  | 1  | 1  |
| 4 | <b>9</b>  | 2  | 6  | 0  | 4  | 5  |
| 4 | <b>12</b> | 9  | 11 | 0  | 6  | 14 |
| 4 | <b>15</b> | 18 | 16 | 1  | 8  | 36 |
| 4 | <b>18</b> | 12 | 18 | 3  | 18 | 33 |
| 4 | <b>21</b> | 26 | 25 | 5  | 38 | 33 |
| 4 | <b>24</b> | 34 | 34 | 11 | 18 | 27 |
| 4 | <b>27</b> | 33 | 33 | 4  | 35 | 18 |
| 4 | <b>30</b> | 44 | 28 | 14 | 42 | 12 |
| 4 | <b>33</b> | 42 | 18 | 11 | 30 | 21 |
| 4 | <b>36</b> | 49 | 25 | 13 | 40 | 26 |
| 4 | <b>39</b> | 51 | 26 | 5  | 31 | 24 |
| 4 | <b>42</b> | 50 | 9  | 7  | 21 | 10 |
| 4 | <b>45</b> | 54 | 6  | 13 | 7  | 3  |
| 4 | <b>48</b> | 34 | 4  | 5  | 7  | 4  |
| 4 | <b>51</b> | 16 | 1  | 1  | 10 | 3  |
| 4 | <b>55</b> | 12 | 2  | 2  | 2  | 2  |
| 4 | <b>57</b> | 3  | 3  | 3  | 1  | 2  |
| 4 | <b>60</b> | 2  | 1  | 0  | 0  | 2  |
| 4 | <b>63</b> | 2  | 1  | 0  | 0  | 0  |
| 4 | <b>66</b> | 0  | 0  | 0  | 0  | 0  |
| 4 | <b>69</b> | 0  | 0  | 0  | 0  | 0  |
