# Supplementary material for: Pleiotropic Impact of Endosymbiont Load and Co-Occurrence in the Maize Weevil Sitophilus zeamais
Source: PubMed Central journal article supplement (PMC4210188; doi:10.1371/journal.pone.0111396), 2014-10-27
Supplement: pone.0111396.s010.pdf [file pone.0111396.s010.pdf]

## 2a Geração

Daily emergence

| replicate | days | control | Amoxyllin | Cirpofluxacin | Rifamycin | Tetracycline |
|-----------|------|---------|-----------|---------------|-----------|--------------|
| 1         | 1    | 3       | 0         | 0             | 0         | 0            |
| 1         | 3    | 7       | 3         | 0             | 1         | 0            |
| 1         | 6    | 6       | 2         | 0             | 0         | 1            |
| 1         | 9    | 10      | 4         | 0             | 3         | 1            |
| 1         | 12   | 11      | 8         | 0             | 5         | 6            |
| 1         | 15   | 12      | 5         | 1             | 12        | 13           |
| 1         | 18   | 23      | 9         | 5             | 18        | 17           |
| 1         | 21   | 38      | 9         | 6             | 19        | 12           |
| 1         | 24   | 41      | 12        | 14            | 23        | 18           |
| 1         | 27   | 42      | 28        | 12            | 36        | 21           |
| 1         | 30   | 57      | 21        | 19            | 40        | 38           |
| 1         | 33   | 53      | 25        | 21            | 49        | 30           |
| 1         | 36   | 55      | 32        | 20            | 63        | 30           |
| 1         | 39   | 81      | 35        | 16            | 74        | 28           |
| 1         | 42   | 63      | 47        | 22            | 63        | 14           |
| 1         | 45   | 69      | 42        | 39            | 93        | 18           |
| 1         | 48   | 42      | 42        | 17            | 37        | 17           |
| 1         | 51   | 31      | 31        | 13            | 33        | 16           |
| 1         | 55   | 29      | 23        | 6             | 32        | 13           |
| 1         | 57   | 19      | 10        | 7             | 15        | 7            |
| 1         | 60   | 4       | 3         | 3             | 8         | 7            |
| 1         | 63   | 5       | 7         | 3             | 9         | 4            |
| 1         | 66   | 2       | 2         | 4             | 6         | 1            |
| 1         | 69   | 3       | 0         | 0             | 4         | 3            |
| 2         | 1    | 4       | 0         | 0             | 0         | 0            |
| 2         | 3    | 5       | 1         | 0             | 0         | 0            |
| 2         | 6    | 11      | 1         | 1             | 5         | 0            |
| 2         | 9    | 17      | 2         | 1             | 9         | 2            |
| 2         | 12   | 16      | 2         | 1             | 8         | 5            |
| 2         | 15   | 20      | 4         | 0             | 13        | 15           |
| 2         | 18   | 25      | 7         | 2             | 13        | 14           |
| 2         | 21   | 31      | 13        | 6             | 29        | 20           |
| 2         | 24   | 49      | 16        | 9             | 32        | 19           |
| 2         | 27   | 38      | 25        | 16            | 30        | 16           |
| 2         | 30   | 28      | 36        | 12            | 43        | 17           |
| 2         | 33   | 26      | 47        | 16            | 60        | 6            |
| 2         | 36   | 21      | 40        | 10            | 48        | 10           |
| 2         | 39   | 57      | 41        | 11            | 85        | 6            |
| 2         | 42   | 76      | 57        | 15            | 71        | 6            |
| 2         | 45   | 70      | 70        | 26            | 71        | 8            |
| 2         | 48   | 21      | 15        | 8             | 23        | 5            |
| 2         | 51   | 16      | 18        | 6             | 17        | 3            |
| 2         | 55   | 16      | 16        | 8             | 7         | 1            |
| 2         | 57   | 11      | 11        | 13            | 8         | 5            |
| 2         | 60   | 4       | 3         | 5             | 6         | 1            |

|   |           |    |    |    |    |    |
|---|-----------|----|----|----|----|----|
| 2 | <b>63</b> | 4  | 10 | 0  | 8  | 1  |
| 2 | <b>66</b> | 3  | 4  | 4  | 4  | 2  |
| 2 | <b>69</b> | 1  | 0  | 1  | 0  | 2  |
| 3 | <b>1</b>  | 1  | 0  | 0  | 0  | 0  |
| 3 | <b>3</b>  | 4  | 1  | 0  | 2  | 0  |
| 3 | <b>6</b>  | 12 | 0  | 0  | 4  | 0  |
| 3 | <b>9</b>  | 15 | 0  | 3  | 4  | 5  |
| 3 | <b>12</b> | 18 | 5  | 0  | 6  | 8  |
| 3 | <b>15</b> | 31 | 11 | 3  | 18 | 8  |
| 3 | <b>18</b> | 40 | 13 | 4  | 8  | 15 |
| 3 | <b>21</b> | 53 | 17 | 7  | 18 | 10 |
| 3 | <b>24</b> | 51 | 19 | 17 | 33 | 23 |
| 3 | <b>27</b> | 67 | 26 | 26 | 31 | 22 |
| 3 | <b>30</b> | 48 | 32 | 15 | 33 | 35 |
| 3 | <b>33</b> | 36 | 30 | 17 | 38 | 13 |
| 3 | <b>36</b> | 32 | 32 | 18 | 41 | 3  |
| 3 | <b>39</b> | 26 | 47 | 17 | 81 | 11 |
| 3 | <b>42</b> | 34 | 33 | 18 | 73 | 6  |
| 3 | <b>45</b> | 33 | 36 | 16 | 58 | 14 |
| 3 | <b>48</b> | 24 | 24 | 8  | 30 | 3  |
| 3 | <b>51</b> | 7  | 14 | 9  | 21 | 7  |
| 3 | <b>55</b> | 9  | 12 | 1  | 21 | 3  |
| 3 | <b>57</b> | 10 | 2  | 8  | 8  | 3  |
| 3 | <b>60</b> | 4  | 6  | 4  | 11 | 1  |
| 3 | <b>63</b> | 4  | 3  | 3  | 8  | 3  |
| 3 | <b>66</b> | 2  | 2  | 0  | 3  | 2  |
| 3 | <b>69</b> | 0  | 1  | 2  | 3  | 3  |
| 4 | <b>1</b>  | 3  | 1  | 0  | 0  | 0  |
| 4 | <b>3</b>  | 14 | 2  | 0  | 0  | 0  |
| 4 | <b>6</b>  | 16 | 3  | 1  | 4  | 0  |
| 4 | <b>9</b>  | 22 | 6  | 1  | 7  | 8  |
| 4 | <b>12</b> | 19 | 9  | 0  | 11 | 11 |
| 4 | <b>15</b> | 39 | 11 | 0  | 17 | 7  |
| 4 | <b>18</b> | 36 | 18 | 0  | 15 | 18 |
| 4 | <b>21</b> | 40 | 20 | 2  | 17 | 12 |
| 4 | <b>24</b> | 45 | 20 | 6  | 31 | 23 |
| 4 | <b>27</b> | 32 | 30 | 12 | 37 | 39 |
| 4 | <b>30</b> | 23 | 38 | 11 | 32 | 36 |
| 4 | <b>33</b> | 26 | 42 | 11 | 44 | 25 |
| 4 | <b>36</b> | 15 | 49 | 9  | 39 | 17 |
| 4 | <b>39</b> | 34 | 48 | 6  | 66 | 22 |
| 4 | <b>42</b> | 29 | 60 | 6  | 39 | 10 |
| 4 | <b>45</b> | 22 | 69 | 8  | 51 | 10 |
| 4 | <b>48</b> | 8  | 15 | 2  | 24 | 6  |
| 4 | <b>51</b> | 7  | 18 | 7  | 24 | 4  |
| 4 | <b>55</b> | 10 | 23 | 5  | 16 | 4  |
| 4 | <b>57</b> | 7  | 10 | 4  | 9  | 1  |
| 4 | <b>60</b> | 6  | 8  | 2  | 10 | 2  |
| 4 | <b>63</b> | 2  | 4  | 3  | 6  | 1  |
| 4 | <b>66</b> | 1  | 5  | 1  | 4  | 1  |

4

|    |   |   |   |   |   |
|----|---|---|---|---|---|
| 69 | 0 | 2 | 3 | 2 | 2 |
|----|---|---|---|---|---|
