# Supplementary material for: Pleiotropic Impact of Endosymbiont Load and Co-Occurrence in the Maize Weevil Sitophilus zeamais
Source: PubMed Central journal article supplement (PMC4210188; doi:10.1371/journal.pone.0111396), 2014-10-27
Supplement: pone.0111396.s011.pdf [file pone.0111396.s011.pdf]

# 1a Geração

Cumulative emergence

| replicate | days | control | Amoxyllin | Cirpofluxacin | Rifamycin | Tetracycline |
|-----------|------|---------|-----------|---------------|-----------|--------------|
| 1         | 1    | 0       | 0         | 0             | 0         | 0            |
| 1         | 3    | 0       | 1         | 0             | 0         | 3            |
| 1         | 6    | 0       | 6         | 0             | 2         | 11           |
| 1         | 9    | 0       | 13        | 0             | 3         | 28           |
| 1         | 12   | 7       | 24        | 2             | 7         | 47           |
| 1         | 15   | 22      | 38        | 5             | 17        | 70           |
| 1         | 18   | 47      | 70        | 7             | 28        | 99           |
| 1         | 21   | 63      | 110       | 9             | 49        | 126          |
| 1         | 24   | 84      | 151       | 16            | 52        | 169          |
| 1         | 27   | 115     | 186       | 23            | 64        | 225          |
| 1         | 30   | 150     | 224       | 32            | 85        | 269          |
| 1         | 33   | 194     | 263       | 36            | 97        | 298          |
| 1         | 36   | 240     | 322       | 44            | 109       | 337          |
| 1         | 39   | 271     | 353       | 51            | 119       | 375          |
| 1         | 42   | 285     | 372       | 61            | 148       | 386          |
| 1         | 45   | 295     | 382       | 62            | 163       | 392          |
| 1         | 48   | 306     | 391       | 63            | 178       | 393          |
| 1         | 51   | 311     | 395       | 66            | 194       | 393          |
| 1         | 55   | 316     | 397       | 66            | 199       | 393          |
| 1         | 57   | 316     | 399       | 66            | 201       | 393          |
| 1         | 60   | 316     | 399       | 66            | 201       | 393          |
| 1         | 63   | 316     | 399       | 66            | 201       | 393          |
| 1         | 66   | 316     | 399       | 66            | 201       | 393          |
| 1         | 69   | 316     | 399       | 66            | 201       | 393          |
| 2         | 1    | 0       | 0         | 0             | 0         | 0            |
| 2         | 3    | 0       | 0         | 0             | 0         | 1            |
| 2         | 6    | 0       | 0         | 1             | 0         | 1            |
| 2         | 9    | 0       | 0         | 5             | 4         | 5            |
| 2         | 12   | 6       | 0         | 11            | 14        | 19           |
| 2         | 15   | 20      | 14        | 16            | 30        | 36           |
| 2         | 18   | 35      | 44        | 22            | 41        | 51           |
| 2         | 21   | 44      | 66        | 33            | 56        | 93           |
| 2         | 24   | 70      | 98        | 46            | 61        | 148          |
| 2         | 27   | 86      | 115       | 67            | 74        | 187          |
| 2         | 30   | 116     | 156       | 97            | 107       | 217          |
| 2         | 33   | 145     | 203       | 124           | 122       | 242          |
| 2         | 36   | 176     | 224       | 144           | 153       | 278          |
| 2         | 39   | 204     | 232       | 160           | 172       | 308          |
| 2         | 42   | 225     | 239       | 166           | 193       | 315          |
| 2         | 45   | 239     | 248       | 178           | 220       | 322          |
| 2         | 48   | 249     | 253       | 181           | 228       | 326          |
| 2         | 51   | 259     | 255       | 181           | 233       | 327          |
| 2         | 55   | 262     | 256       | 183           | 234       | 328          |
| 2         | 57   | 264     | 257       | 184           | 234       | 329          |
| 2         | 60   | 264     | 258       | 184           | 235       | 329          |
| 2         | 63   | 264     | 258       | 184           | 235       | 329          |

|   |           |     |     |     |     |     |
|---|-----------|-----|-----|-----|-----|-----|
| 2 | <b>66</b> | 264 | 259 | 184 | 235 | 329 |
| 2 | <b>69</b> | 264 | 259 | 184 | 235 | 329 |
| 3 | <b>1</b>  | 0   | 0   | 0   | 0   | 0   |
| 3 | <b>3</b>  | 0   | 0   | 0   | 0   | 1   |
| 3 | <b>6</b>  | 0   | 7   | 0   | 0   | 3   |
| 3 | <b>9</b>  | 0   | 20  | 1   | 3   | 10  |
| 3 | <b>12</b> | 2   | 35  | 5   | 3   | 27  |
| 3 | <b>15</b> | 16  | 63  | 9   | 5   | 50  |
| 3 | <b>18</b> | 29  | 101 | 17  | 7   | 86  |
| 3 | <b>21</b> | 52  | 130 | 31  | 20  | 128 |
| 3 | <b>24</b> | 85  | 170 | 47  | 31  | 165 |
| 3 | <b>27</b> | 117 | 210 | 64  | 58  | 207 |
| 3 | <b>30</b> | 145 | 237 | 93  | 96  | 229 |
| 3 | <b>33</b> | 174 | 260 | 120 | 127 | 251 |
| 3 | <b>36</b> | 204 | 293 | 133 | 181 | 271 |
| 3 | <b>39</b> | 223 | 314 | 138 | 222 | 295 |
| 3 | <b>42</b> | 237 | 323 | 145 | 252 | 306 |
| 3 | <b>45</b> | 249 | 337 | 153 | 274 | 316 |
| 3 | <b>48</b> | 255 | 344 | 154 | 294 | 319 |
| 3 | <b>51</b> | 258 | 345 | 159 | 315 | 320 |
| 3 | <b>55</b> | 261 | 349 | 161 | 320 | 321 |
| 3 | <b>57</b> | 264 | 350 | 161 | 324 | 324 |
| 3 | <b>60</b> | 264 | 350 | 161 | 325 | 327 |
| 3 | <b>63</b> | 264 | 350 | 161 | 329 | 328 |
| 3 | <b>66</b> | 264 | 350 | 161 | 329 | 328 |
| 3 | <b>69</b> | 264 | 350 | 161 | 329 | 328 |
| 4 | <b>1</b>  | 0   | 0   | 0   | 0   | 0   |
| 4 | <b>3</b>  | 0   | 0   | 0   | 2   | 0   |
| 4 | <b>6</b>  | 0   | 2   | 0   | 3   | 1   |
| 4 | <b>9</b>  | 2   | 8   | 0   | 7   | 6   |
| 4 | <b>12</b> | 11  | 19  | 0   | 13  | 20  |
| 4 | <b>15</b> | 29  | 35  | 1   | 21  | 56  |
| 4 | <b>18</b> | 41  | 53  | 4   | 39  | 89  |
| 4 | <b>21</b> | 67  | 78  | 9   | 77  | 122 |
| 4 | <b>24</b> | 101 | 112 | 20  | 95  | 149 |
| 4 | <b>27</b> | 134 | 145 | 24  | 130 | 167 |
| 4 | <b>30</b> | 178 | 173 | 38  | 172 | 179 |
| 4 | <b>33</b> | 220 | 191 | 49  | 202 | 200 |
| 4 | <b>36</b> | 269 | 216 | 62  | 242 | 226 |
| 4 | <b>39</b> | 320 | 242 | 67  | 273 | 250 |
| 4 | <b>42</b> | 370 | 251 | 74  | 294 | 260 |
| 4 | <b>45</b> | 424 | 257 | 87  | 301 | 263 |
| 4 | <b>48</b> | 458 | 261 | 92  | 308 | 267 |
| 4 | <b>51</b> | 474 | 262 | 93  | 318 | 270 |
| 4 | <b>55</b> | 486 | 264 | 95  | 320 | 272 |
| 4 | <b>57</b> | 489 | 267 | 98  | 321 | 274 |
| 4 | <b>60</b> | 491 | 268 | 98  | 321 | 276 |
| 4 | <b>63</b> | 493 | 269 | 98  | 321 | 276 |
| 4 | <b>66</b> | 493 | 269 | 98  | 321 | 276 |
| 4 | <b>69</b> | 493 | 269 | 98  | 321 | 276 |
