# Supplementary material for: Pleiotropic Impact of Endosymbiont Load and Co-Occurrence in the Maize Weevil Sitophilus zeamais
Source: PubMed Central journal article supplement (PMC4210188; doi:10.1371/journal.pone.0111396), 2014-10-27
Supplement: pone.0111396.s012.pdf [file pone.0111396.s012.pdf]

## 2a Geração

Cumulative emergence

| replicate | days | control | Amoxyllin | Cirpofluxacin | Rifamycin | Tetracycline |
|-----------|------|---------|-----------|---------------|-----------|--------------|
| 1         | 1    | 0       | 0         | 0             | 0         | 0            |
| 1         | 3    | 10      | 3         | 0             | 1         | 0            |
| 1         | 6    | 16      | 5         | 0             | 1         | 1            |
| 1         | 9    | 26      | 9         | 0             | 4         | 2            |
| 1         | 12   | 37      | 17        | 0             | 9         | 8            |
| 1         | 15   | 49      | 22        | 1             | 21        | 21           |
| 1         | 18   | 72      | 31        | 6             | 39        | 38           |
| 1         | 21   | 110     | 40        | 12            | 58        | 50           |
| 1         | 24   | 151     | 52        | 26            | 81        | 68           |
| 1         | 27   | 193     | 80        | 38            | 117       | 89           |
| 1         | 30   | 250     | 101       | 57            | 157       | 127          |
| 1         | 33   | 303     | 126       | 78            | 206       | 157          |
| 1         | 36   | 358     | 158       | 98            | 269       | 187          |
| 1         | 39   | 439     | 193       | 114           | 343       | 215          |
| 1         | 42   | 502     | 240       | 136           | 406       | 229          |
| 1         | 45   | 571     | 282       | 175           | 499       | 247          |
| 1         | 48   | 613     | 324       | 192           | 536       | 264          |
| 1         | 51   | 644     | 355       | 205           | 569       | 280          |
| 1         | 55   | 673     | 378       | 211           | 601       | 293          |
| 1         | 57   | 692     | 388       | 218           | 616       | 300          |
| 1         | 60   | 696     | 391       | 221           | 624       | 307          |
| 1         | 63   | 701     | 398       | 224           | 633       | 311          |
| 1         | 66   | 703     | 400       | 228           | 639       | 312          |
| 1         | 69   | 706     | 400       | 228           | 643       | 315          |
| 2         | 1    | 0       | 0         | 0             | 0         | 0            |
| 2         | 3    | 9       | 1         | 0             | 0         | 0            |
| 2         | 6    | 20      | 2         | 1             | 5         | 0            |
| 2         | 9    | 37      | 4         | 2             | 14        | 2            |
| 2         | 12   | 53      | 6         | 3             | 22        | 7            |
| 2         | 15   | 73      | 10        | 3             | 35        | 22           |
| 2         | 18   | 98      | 17        | 5             | 48        | 36           |
| 2         | 21   | 129     | 30        | 11            | 77        | 56           |
| 2         | 24   | 178     | 46        | 20            | 109       | 75           |
| 2         | 27   | 216     | 71        | 36            | 139       | 91           |
| 2         | 30   | 244     | 107       | 48            | 182       | 108          |
| 2         | 33   | 270     | 154       | 64            | 242       | 114          |
| 2         | 36   | 291     | 194       | 74            | 290       | 124          |
| 2         | 39   | 348     | 235       | 85            | 375       | 130          |
| 2         | 42   | 424     | 292       | 100           | 446       | 136          |
| 2         | 45   | 494     | 362       | 126           | 517       | 144          |
| 2         | 48   | 515     | 377       | 134           | 540       | 149          |
| 2         | 51   | 531     | 395       | 140           | 557       | 152          |
| 2         | 55   | 547     | 411       | 148           | 564       | 153          |
| 2         | 57   | 558     | 422       | 161           | 572       | 158          |
| 2         | 60   | 562     | 425       | 166           | 578       | 159          |

|   |           |            |     |     |     |     |
|---|-----------|------------|-----|-----|-----|-----|
| 2 | <b>63</b> | <b>566</b> | 435 | 166 | 586 | 160 |
| 2 | <b>66</b> | <b>569</b> | 439 | 170 | 590 | 162 |
| 2 | <b>69</b> | <b>570</b> | 439 | 171 | 590 | 164 |
| 3 | <b>1</b>  | 0          | 0   | 0   | 0   | 0   |
| 3 | <b>3</b>  | 5          | 1   | 0   | 2   | 0   |
| 3 | <b>6</b>  | 17         | 1   | 0   | 6   | 0   |
| 3 | <b>9</b>  | 32         | 1   | 3   | 10  | 5   |
| 3 | <b>12</b> | 50         | 6   | 3   | 16  | 13  |
| 3 | <b>15</b> | 81         | 17  | 6   | 34  | 21  |
| 3 | <b>18</b> | 121        | 30  | 10  | 42  | 36  |
| 3 | <b>21</b> | 174        | 47  | 17  | 60  | 46  |
| 3 | <b>24</b> | 225        | 66  | 34  | 93  | 69  |
| 3 | <b>27</b> | 292        | 92  | 60  | 124 | 91  |
| 3 | <b>30</b> | 340        | 124 | 75  | 157 | 126 |
| 3 | <b>33</b> | 376        | 154 | 92  | 195 | 139 |
| 3 | <b>36</b> | 408        | 186 | 110 | 236 | 142 |
| 3 | <b>39</b> | 434        | 233 | 127 | 317 | 153 |
| 3 | <b>42</b> | 468        | 266 | 145 | 390 | 159 |
| 3 | <b>45</b> | 501        | 302 | 161 | 448 | 173 |
| 3 | <b>48</b> | 525        | 326 | 169 | 478 | 176 |
| 3 | <b>51</b> | 532        | 340 | 178 | 499 | 183 |
| 3 | <b>55</b> | 541        | 352 | 179 | 520 | 186 |
| 3 | <b>57</b> | 551        | 354 | 187 | 528 | 189 |
| 3 | <b>60</b> | 555        | 360 | 191 | 539 | 190 |
| 3 | <b>63</b> | 559        | 363 | 194 | 547 | 193 |
| 3 | <b>66</b> | 561        | 365 | 194 | 550 | 195 |
| 3 | <b>69</b> | 561        | 366 | 196 | 553 | 198 |
| 4 | <b>1</b>  | 0          | 0   | 0   | 0   | 0   |
| 4 | <b>3</b>  | 17         | 3   | 0   | 0   | 0   |
| 4 | <b>6</b>  | 33         | 6   | 1   | 4   | 0   |
| 4 | <b>9</b>  | 55         | 12  | 2   | 11  | 8   |
| 4 | <b>12</b> | 74         | 21  | 2   | 22  | 19  |
| 4 | <b>15</b> | 113        | 32  | 2   | 39  | 26  |
| 4 | <b>18</b> | 149        | 50  | 2   | 54  | 44  |
| 4 | <b>21</b> | 189        | 70  | 4   | 71  | 56  |
| 4 | <b>24</b> | 234        | 90  | 10  | 102 | 79  |
| 4 | <b>27</b> | 266        | 120 | 22  | 139 | 118 |
| 4 | <b>30</b> | 289        | 158 | 33  | 171 | 154 |
| 4 | <b>33</b> | 315        | 200 | 44  | 215 | 179 |
| 4 | <b>36</b> | 330        | 249 | 53  | 254 | 196 |
| 4 | <b>39</b> | 364        | 297 | 59  | 320 | 218 |
| 4 | <b>42</b> | 393        | 357 | 65  | 359 | 228 |
| 4 | <b>45</b> | 415        | 426 | 73  | 410 | 238 |
| 4 | <b>48</b> | 423        | 441 | 75  | 434 | 244 |
| 4 | <b>51</b> | 430        | 459 | 82  | 458 | 248 |
| 4 | <b>55</b> | 440        | 482 | 87  | 474 | 252 |
| 4 | <b>57</b> | 447        | 492 | 91  | 483 | 253 |
| 4 | <b>60</b> | 453        | 500 | 93  | 493 | 255 |
| 4 | <b>63</b> | 455        | 504 | 96  | 499 | 256 |
| 4 | <b>66</b> | 456        | 509 | 97  | 503 | 257 |

4

|           |     |     |     |     |     |
|-----------|-----|-----|-----|-----|-----|
| <b>69</b> | 456 | 511 | 100 | 505 | 259 |
|-----------|-----|-----|-----|-----|-----|
